# Supplementary material
Source: publisher figshare collection journal article supplement (https://acs.figshare.com/ndownloader/files/4115491)
Supplement: Supplementary file 1 [file 4115491]

# **Who is doing the job? Unraveling the role of Ga<sub>2</sub>O<sub>3</sub> in methanol steam reforming on Pd<sub>2</sub>Ga/Ga<sub>2</sub>O<sub>3</sub>**

*Andreas Haghofer<sup>a</sup>, Davide Ferri<sup>b</sup>, Karin Föttinger<sup>a\*</sup>, Günther Rupprechter<sup>a</sup>*

<sup>a</sup> Institute of Materials Chemistry, Vienna University of Technology, Getreidemarkt 9/BC, A-  
1060 Vienna, Austria

<sup>b</sup> Empa, Swiss Federal Laboratories for Material Science and Technology, Laboratory for Solid  
State Chemistry and Catalysis, Ueberlandstr. 129, CH-8600 Dübendorf, Switzerland

\* CORRESPONDING AUTHOR FOOTNOTE

Karin Föttinger

Tel.: +43 1 58801 165110; Fax: +43 1 58801 16599; e-mail: [karin.foettinger@tuwien.ac.at](mailto:karin.foettinger@tuwien.ac.at)

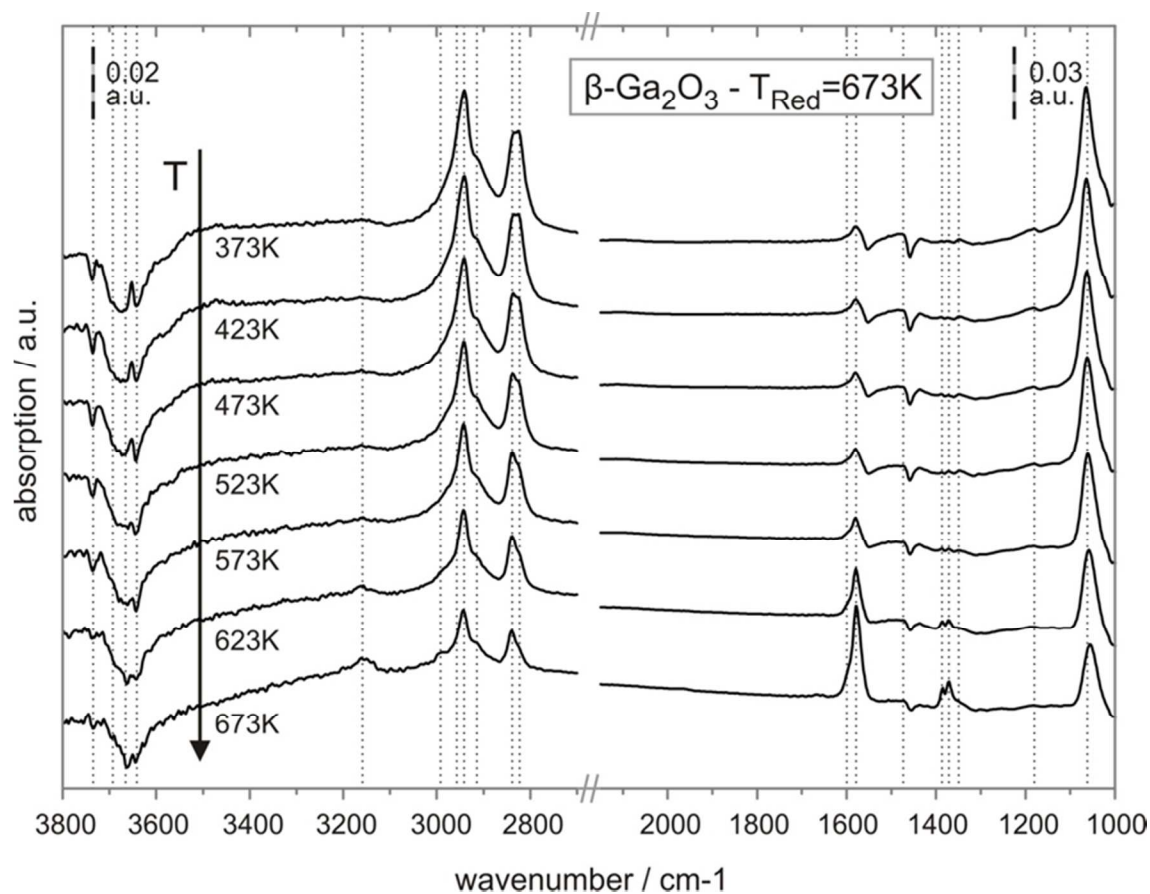

Figure S1: FTIR spectra of  $\beta\text{-Ga}_2\text{O}_3$  reduced at  $673\text{K}$ , recorded after adsorption of  $\text{CH}_3\text{OH}$ , during heating from  $373$  to  $673\text{K}$  in high vacuum.
